# Supplementary material for: DNA methylation alters transcriptional rates of differentially expressed genes and contributes to pathophysiology in mice fed a high fat diet
Source: PubMed Central journal article supplement — Mol Metab. 2017 Feb 3;6(4):327–39. doi: 10.1016/j.molmet.2017.02.001 (PMC5369282; doi:10.1016/j.molmet.2017.02.001), 2017-02-03
Supplement: mmc1.pdf [file mmc1.pdf]

**Supplementary Materials.** DNA methylation alters transcriptional rates of differentially expressed genes and contributes to pathophysiology in mice fed a high fat diet by Zhang et al.

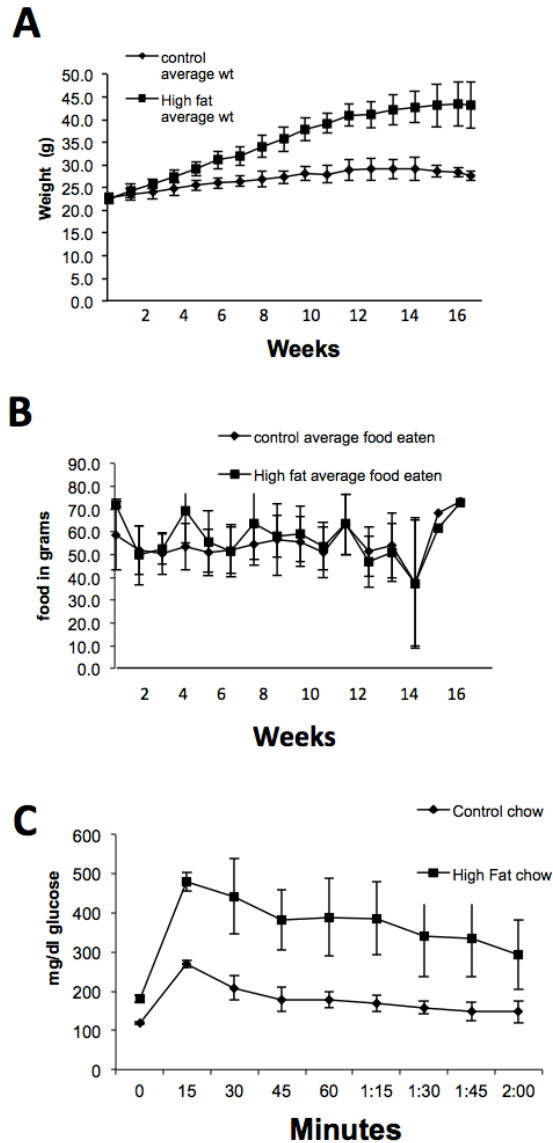

**Figure S1. Characterization of mice on a high fat diet.** C57BL/6 mice were placed on a high fat or normal chow diet for 14 weeks. A. Average weight of the animals over the course of the experiment. B. Food intake was measured in grams. C. An intraperitoneal glucose tolerance test was performed and blood glucose was measured for the times indicated. (data are the mean +/- SEM, \*, P < 0.05)

**Figure S2.**

DifMeth +/- 10,000 bp from TSS

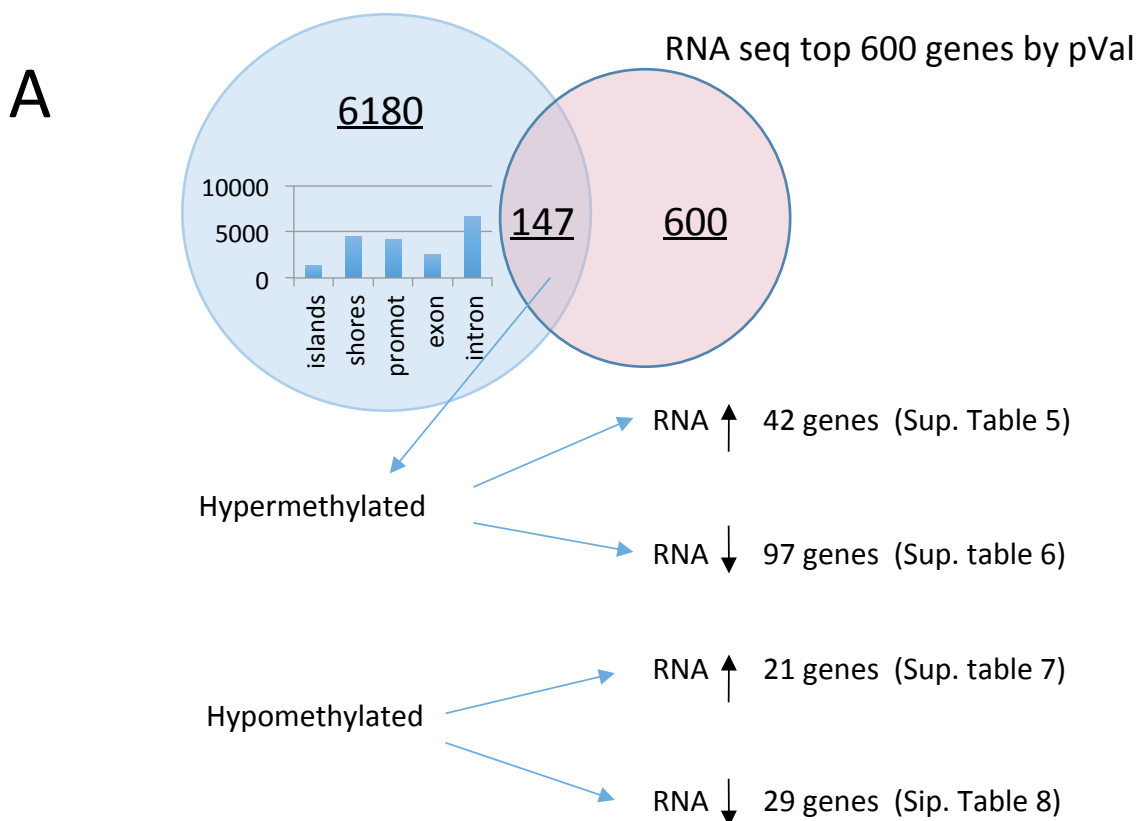

**B**

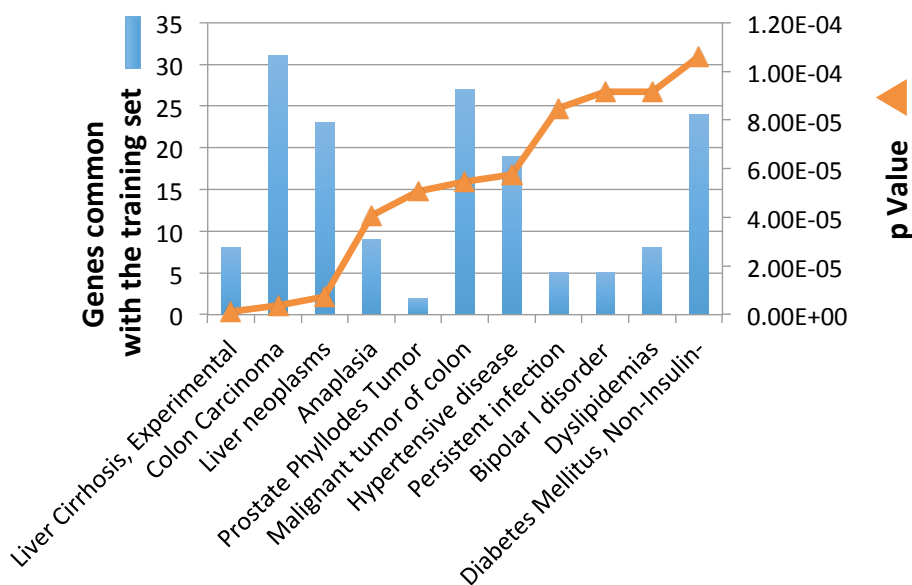

**Figure S2. Analysis of differentially expressed genes with differentially methylated CpGs after 14 weeks on a high fat diet.** A. 8870 significantly differentially methylated CpGs, representing 6180 genes, were found within 10,000 bp of transcription start sites (TSS). When intersected with the top 600 differentially expressed RNAs, 147 genes were found in common. Numbers of genes found to be increased or decreased with corresponding hypermethylated or hypomethylated CpGs are shown (lists of those genes in are found in supplementary tables 5-8). Note that many genes have multiple differentially methylated CpGs, and genes may have CpGs that are both hypo- and hypermethylated. B. Toppgene [1] analysis of disease prioritization showing number of genes in common with the training set and the p Value. Diseases correlating with altered genes from the high fat diet include cirrhosis, cancer, hypertensive disease, dyslipidemia and diabetes – all consistent with the development of the metabolic syndrome [2].

**Supplemental Table 1. RT-PCR and ChIP oligonucleotides**

| <b>Name</b>              | <b>Left primer</b>    | <b>Right primer</b>   |
|--------------------------|-----------------------|-----------------------|
| <b>pre-mRNA</b>          |                       |                       |
| <i>Slc16a5</i>           | GCATGGCGGATTAACCTCATT | GGTAGCGTTCTCCATTTTGG  |
| <i>Gnmt</i>              | GAGGCCTAAGCAGATGGTGT  | GGGCAGCCCAACCTTATAGT  |
| <i>Phlda1</i>            | TCCGTGTCCTTTCTTTCCAG  | GCTTCCTGCAACTGTGATGA  |
| <i>Foxa3</i>             | TTCGCCTTTCTCTTTCTCCA  | CCTCGGCTCTTGGTGTACTT  |
| <i>Onecut 1</i>          | GGCTGTGAGGAATGGTTGAC  | TTGGACGGACGCTTATTTTC  |
| <b>ChIP</b>              |                       |                       |
| <i>Phlda1</i> promoter   | CCTGCCTGGATCTGCTACC   | GCAGGTTCTGGAAACTCCTG  |
| <i>Phlda1</i> EXON1      | GAAGGATGCTGGAGAACAGC  | ACTAGGTTGGGACGGTTCCG  |
| <i>Phlda1</i> EXON2      | TCCGTGTCCTTTCTTTCCAG  | GCTTCCTGCAACTGTGATGA  |
| <i>Onecut1</i> promoter  | CCTCGGTTCAATTTGTGCTG  | GGCTCGGTTACTGTTGCAGA  |
| <i>Onecut1</i> Exon1     | ACAAGATGCTCACCCCAAAT  | ATCTCTTCCATCTGCCCTGA  |
| <i>Onecut1</i> Exon2     | GAAAATAAGCGTCCGTCCAA  | AAGTGCTCGATGAGGACGAT  |
| <i>Onecut1</i> Exon2 end | GGAAAATAAGCGTCCGTCCA  | TTCCTCCCTCATGCTTTGGT  |
| <i>Foxa3</i> Exon1       | GGGGCTAGTGCCTGTAGAGA  | ATCCCCGAGGACACACC     |
| <i>Foxa3</i> Exon2       | TTGAACCCACTCAGC TCTCC | CCTTTGCCATCTCTTTTCCA  |
| <i>Foxa3</i> Exon2 end   | TTCCTTTCTTTCCACGGTTG  | GTGCCTTTTTAATGGCCAAA  |
| <i>Foxa3</i> promoter    | TTCCTTTCTTTCCACGGTTG  | GGATAACGGGAAAGTCATCG  |
| <b>mRNA</b>              |                       |                       |
| <i>β-actin</i>           | AGCCATGTACGTAGCCATCC  | CTCTCAGCTGTGGTGGTGAA  |
| <i>Gnmt</i>              | AAGAGGGCTTCAGCGTGATG  | CTGGCAAGTGAGCAAACCTGT |
| <i>Slc16a5</i>           | ATCACGGTAGTGGGCTTGTAT | TGGAGTAAGATGCCACCGAAG |
| <i>Slc25a3</i>           | CATCACCAAGAAGCACCTGA  | GTACCCTTATAGCCCGCACA  |
| <i>Irx3</i>              | GACGAGGAAGAGAGCAAACG  | TCGTCCGAGTCGCTAGTTTT  |
| <i>Cish</i>              | TCGGGAAGTGGATGCTTATC  | AAACTCCAGACACCCCACTG  |
| <i>Socs2</i>             | TGGCTGCTCAAGATCAAATG  | TGCCTCCTGGAAATGGAAG   |

|                |                         |                        |
|----------------|-------------------------|------------------------|
| <i>Foxa1</i>   | CAGCACAAGCTGGACTTCAA    | AGCACGGGTCTGGAATACAC   |
| <i>Foxa2</i>   | GACATACCGACGCAGCAGCTACA | GGCACCTTGAGAAAGCAGTC   |
| <i>Onecut1</i> | GGCAACGTGAGCGGTAGTTT    | TTGCTGGGAGTTGTGAATGCT  |
| <i>Phlda1</i>  | GGGCTACTGCTCATACCGC     | AAAAGTGCAATTCCTTCAGCTT |
| <i>Foxa3</i>   | CTACATGACCTTGAACCCACTC  | GGGCTACATACCCGGAAGC    |

**Supplemental Table 2. Summary statistic for RNA-seq**

| <b>Library</b>  | <b>total reads</b> | <b>aligned reads</b> | <b>% aligned</b> |
|-----------------|--------------------|----------------------|------------------|
| <b>normal</b>   |                    |                      |                  |
| 1_1BC           | 42,315,569         | 36,343,322           | 0.858864074      |
| 1_1LC           | 21,658,077         | 17,575,957           | 0.811519739      |
| 1_1NC           | 59,685,957         | 50,084,723           | 0.839137471      |
| 1_1RC           | 34,954,648         | 28,458,348           | 0.81415061       |
| 2_1LC           | 31,907,946         | 26,294,512           | 0.824074104      |
| 2_1NC           | 31,732,872         | 26,096,217           | 0.822371735      |
| 2_1RC           | 53,368,278         | 42,173,702           | 0.790239138      |
| <b>high fat</b> |                    |                      |                  |
| 1_4BC           | 53,863,635         | 43,665,966           | 0.810676183      |
| 1_4LC           | 37,439,032         | 28,227,112           | 0.753948767      |
| 1_4NC           | 38,131,178         | 29,035,979           | 0.761476055      |
| 1_4RC           | 34,835,729         | 26,676,785           | 0.765788051      |
| 2_4LC           | 20,302,121         | 17,692,470           | 0.871459194      |
| 2_4NC           | 41,644,336         | 36,539,067           | 0.877407842      |
| 2_4RC           | 23,634,778         | 19,678,396           | 0.832603378      |

**Supplemental Table 3. Summary Statistics for DNA Methyl-Seq**

| Sample ID       | #reads      | # pairs    | # pairs removed after trimming | #pairs remaining | # Paired end alignment with unique best hit |       | # duplicated pairs | pairs analyzed | % pairs analyzed | approximate fold coverage (52Mb capture) |
|-----------------|-------------|------------|--------------------------------|------------------|---------------------------------------------|-------|--------------------|----------------|------------------|------------------------------------------|
| <b>Normal</b>   |             |            |                                |                  |                                             |       |                    |                |                  |                                          |
| G1_1RC          | 108,787,410 | 54,393,705 | 1,213,575                      | 53,180,130       | 36,727,668                                  | 69.1% | 11,143,605         | 25,584,063     | 47.03%           |                                          |
| G1_1LC          | 128,228,736 | 64,114,368 | 1,450,274                      | 62,664,094       | 43,654,179                                  | 69.7% | 9,550,798          | 34,103,381     | 53.19%           | 131.16685                                |
| G2_1LC          | 124,264,108 | 62,132,054 | 1,400,257                      | 60,731,797       | 42,685,346                                  | 70.3% | 1,270,902          | 41,414,444     | 66.66%           | 159.2863231                              |
| G1_1NC          | 120,760,734 | 60,380,367 | 1,392,279                      | 58,988,088       | 40,589,058                                  | 68.8% | 4,894,023          | 35,695,035     | 59.12%           | 137.2885962                              |
| G2_1RC          | 117,629,094 | 58,814,547 | 1,343,298                      | 57,471,249       | 38,964,159                                  | 67.8% | 11,124,280         | 27,839,879     | 47.34%           | 107.0764577                              |
| G2_1NC          | 113,885,548 | 56,942,774 | 1,297,220                      | 55,645,554       | 38,621,945                                  | 69.4% | 9,178,454          | 29,443,491     | 51.71%           | 113.2441962                              |
| G1_1BC          | 116,203,544 | 58,101,772 | 1,318,334                      | 56,783,438       | 39,496,146                                  | 69.6% | 9,994,402          | 29,501,744     | 50.78%           | 113.4682462                              |
|                 |             |            |                                |                  |                                             |       |                    |                |                  |                                          |
| <b>High Fat</b> |             |            |                                |                  |                                             |       |                    |                |                  |                                          |
| G1_4NC          | 169,802,970 | 84,901,485 | 2,034,858                      | 82,866,627       | 57,067,889                                  | 68.9% | 14,046,240         | 43,021,649     | 50.67%           | 165.4678808                              |
| G1_4BC          | 157,695,914 | 78,847,957 | 1,957,171                      | 76,890,786       | 52,182,910                                  | 67.9% | 9,264,249          | 42,918,661     | 54.43%           | 165.0717731                              |
| G1_4RC          | 186,815,332 | 93,407,666 | 2,058,068                      | 91,349,598       | 62,090,548                                  | 68.0% | 29,997,052         | 32,093,496     | 34.36%           | 123.4365231                              |
| G2_4RC          | 149,406,108 | 74,703,054 | 1,618,152                      | 73,084,902       | 51,158,472                                  | 70.0% | 24,190,973         | 26,967,499     | 36.10%           | 103.72115                                |
| G2_4LC          | 131,049,978 | 65,524,989 | 1,534,427                      | 63,990,562       | 42,881,093                                  | 67.0% | 12,239,682         | 30,641,411     | 46.76%           | 117.8515808                              |
| G2_4NC          | 98,751,052  | 49,375,526 | 1,176,190                      | 48,199,336       | 33,022,488                                  | 68.5% | 10,364,887         | 22,657,601     | 45.89%           | 87.14461923                              |



Supplementary Table 5. Genes with Hypermethylated CpGs increased expression.

|       |         |         |        |          |        |
|-------|---------|---------|--------|----------|--------|
| Acot4 | Cidea   | Gngt1   | Ntrk2  | Rtn4     | Tpm2   |
| Ar    | Corin   | Kbtbd11 | Osbp13 | Sh2d4a   | Trdmt1 |
| Car3  | Cpeb1   | Lgals1  | Pax8   | Slc13a4  | Unc13a |
| Cdca2 | Cxcl11  | Mab21l3 | Pdlim2 | Slc22a26 | Wfdc2  |
| Cenpf | Cyp26a1 | Mfap3l  | Plscr2 | Smc2     | Zfp442 |
| Cenpw | Fsip1   | Mogat1  | Prrx1  | Snai2    |        |
| Cep55 | Gadd45b | Neb1    | Raet1d | Sult1c2  |        |

Supplementary Table 6. Genes with Hypermethylated CpGs decreased expression.

|               |         |         |           |         |         |           |           |           |        |
|---------------|---------|---------|-----------|---------|---------|-----------|-----------|-----------|--------|
| 3930402G23Rik | Cadm4   | Dact1   | Foxa3     | Hp      | Lepre1  | Phlda1    | Serpina1a | Srd5a1    | Xirp1  |
| Al118078      | Cd4     | Dnajc12 | Fzd5      | Hspa5   | Llgl2   | Pitx3     | Serpina1e | Srgap3    | Zbtb7c |
| Abtb2         | Chrna2  | Dpy19l3 | Fzd7      | Hyal1   | Lrfn3   | Plcx2     | Shb       | Susd4     | Zfhx3  |
| Adcy1         | Cldn1   | Efna3   | Got1      | Id2     | Myo1e   | Prhoxnb   | Sid2      | Syvn1     | Zfp217 |
| Agap2         | Cobl    | Egfr    | Grm8      | Id3     | Nudt7   | Qsox1     | Sik3      | Tbc1d30   | Zfp568 |
| Ankrd33b      | Creld2  | Erbp3   | H13       | Igfbp2  | Oaf     | Rcl1      | Slc13a2   | Tgm1      | Zfp598 |
| Apoa1         | Crip2   | Fabp5   | Hhex      | Il22ra1 | Onecut1 | Rnase4    | Slc25a34  | Tnfrsf81l | Zfpm1  |
| Arid5b        | Crybb3  | Fga     | Hip1r     | Irf6    | Orm1    | Scara5    | Socs3     | Tspan9    |        |
| Atp2a2        | Cyp1a2  | Fgb     | Hist2h3c2 | Irs2    | Pck1    | Sel1l3    | Sorbs3    | Usp6nl    |        |
| C8b           | Cyp21a1 | Fkbp11  | Hopx      | Lad1    | Pde9a   | Serpina10 | Sox12     | Vtn       |        |

Supplementary Table 6. Genes with Hypomethylated CpGs increased expression.

|               |        |               |         |         |         |      |
|---------------|--------|---------------|---------|---------|---------|------|
| A530016L24Rik | Aatk   | B430212C06Rik | Caprin2 | Car3    | Fam126a | Far1 |
| Mad2l1        | Mpped2 | Neb1          | Pdlim2  | Pdcp    | Rtn4    | Smc2 |
| Stap1         | Stil   | Tpm2          | Trdmt1  | Tsc22d1 | Unc13a  |      |

Supplementary Table 6. Genes with Hypomethylated CpGs decreased expression.

|         |          |       |         |       |       |        |          |         |         |
|---------|----------|-------|---------|-------|-------|--------|----------|---------|---------|
| Ada     | Ccdc11   | Cd276 | Cish    | Crip2 | Dact1 | Fzd7   | Gfra1    | Gm11194 | Ifitm2  |
| Igfbp2  | Myl1     | Myo1e | Onecut1 | Pck1  | Pitx3 | Sel1l3 | Serpine2 | Sik3    | Slc41a3 |
| Slco2a1 | Tmem120b | Tnk2  | Tspan9  | Tuba8 | Tuft1 | Wnk4   | Zfp217   | Zfpm1   |         |

**Supplemental Table 9. Characteristics of genes differentially methylated and expressed in liver after a high fat diet.**

| Gene           | DNA Methylation HF vs SC | RNAseq HF vs SC | RT-PCR HF vs SC | Function/ Role in Obesity/Diabetes                         |
|----------------|--------------------------|-----------------|-----------------|------------------------------------------------------------|
| <i>Foxa3</i>   | 6.12*                    | 0.64*           | 0.26*           | Development, glucose homeostasis in adult liver            |
| <i>Hip1R</i>   | 13.35*                   | 0.54*           | 0.75            | Huntington's interacting protein 1 related, endocytosis    |
| <i>Notch3</i>  | 20.37*                   | 0.53*           | 0.72            | Hypertension                                               |
| <i>Phlda1</i>  | 13.03*                   | 0.27*           | 0.33*           | Associated with steatosis: KO animals have liver steatosis |
| <i>Scara5</i>  | -22.75*                  | 1.61*           | 0.62            | Scavenger receptor                                         |
| <i>Sik3</i>    | 15.85*                   | 0.63*           | 0.78            | Salt inducible kinase 3, member of AMPK family             |
| <i>Trdmt1</i>  | 23.83*                   | 0.20*           | 0.61            | tRNA aspartic acid methyl-transferase 1                    |
| <i>Onecut1</i> | 21.7*                    | 0.22*           | 0.41            | Liver development                                          |

Mean of fold change comparing high fat diet (HF) to standard chow diet (SC) using data from RNAseq or RT-PCR. For DNA Methyl-seq, data are relative differences in percentage methylation in CpGs within 1,000 bp of the TSS of the indicated gene. The *Phlda1* assignment was a CpG ~10,000 bp from the TSS. n=7, \* p < 0.05



## References for Supplemental Material.

- [1] Chen, J., Bardes, E. E., Aronow, B. J., and Jegga, A. G., 2009. ToppGene Suite for gene list enrichment analysis and candidate gene prioritization. *Nucleic acids research* 37: W305-311
- [2] Kaur, J., 2014. A comprehensive review on metabolic syndrome. *Cardiology research and practice* 2014: 943162
